# Supplementary material for: Post-transcriptional regulation of IFI16 promotes inflammatory endothelial pathophenotypes observed in pulmonary arterial hypertension
Source: PubMed Central journal article supplement — bioRxiv. 2024 Sep 20:2024.09.19.613988. Preprint. [Version 1] doi: 10.1101/2024.09.19.613988 (PMC11429958; doi:10.1101/2024.09.19.613988), 2024-09-20
Supplement: media-1.pdf [file media-1.pdf]

## Supplemental Material

### Post-transcriptional regulation of IFI16 promotes inflammatory endothelial pathophenotypes observed in pulmonary arterial hypertension

Rashmi J. Rao<sup>a, #</sup>, Jimin Yang<sup>b, #</sup>, Siyi Jiang<sup>a</sup>, Wadiah El-Khoury<sup>a</sup>, Neha Hafeez<sup>a,c</sup>, Satoshi Okawa<sup>a,d,e</sup>, Yi Yin Tai<sup>a</sup>, Ying Tang<sup>a</sup>, Yassmin Al Aaraj<sup>a</sup>, John Sembrat<sup>f</sup>, Stephen Y. Chan<sup>a</sup>

- a) Center for Pulmonary Vascular Biology and Medicine, Pittsburgh Heart, Lung, Blood, and Vascular Medicine Institute, Division of Cardiology, Department of Medicine, University of Pittsburgh School of Medicine and University of Pittsburgh Medical Center, Pittsburgh, PA, USA
- b) Department of Molecular Biology, Jeonbuk National University, Jeonju, South Korea
- c) Department of Medicine, Hospital of the University of Pennsylvania, Philadelphia, PA, USA
- d) Department of Computational and Systems Biology, University of Pittsburgh School of Medicine and University of Pittsburgh Medical Center, Pittsburgh, PA, USA
- e) McGowan Institute for Regenerative Medicine, University of Pittsburgh School of Medicine and University of Pittsburgh Medical Center, Pittsburgh, PA, USA
- f) Division of Pulmonary, Allergy, Critical Care, and Sleep Medicine, Department of Medicine, University of Pittsburgh School of Medicine, Pittsburgh, PA, USA

\*# Equal Contribution

**Table S1. Clinical Characteristics for Group 1 PAH Patients (Human Lung Tissue)**

| Group                           | Age | Gender | mPAP |
|---------------------------------|-----|--------|------|
| Control 1                       | 36  | M      | -    |
| Control 2                       | 37  | M      | -    |
| Control 3                       | 66  | M      | -    |
| Control 4                       | 13  | M      | -    |
| Control 5                       | 44  | F      | -    |
| PH 1: Connective tissue disease | 53  | F      | 53   |
| PH 2: IPAH                      | 21  | M      | 69   |
| PH 3: IPAH                      | 50  | F      | 56   |
| PH 4: IPAH                      | 51  | F      | 59   |

**Table S2. Clinical Characteristics for Group 1 PAH Patients (Human Blood Samples)**

| Group                           | Age | Gender | mPAP |
|---------------------------------|-----|--------|------|
| Control 1: No PH                | 58  | M      | 14   |
| Control 2: No PH                | 61  | F      | 8    |
| Control 3: Healthy control      | 40  | F      | -    |
| Control 4: Healthy control      | 66  | F      | -    |
| Control 5: Healthy control      | 53  | F      | -    |
| PH 1: IPAH                      | 64  | M      | 53   |
| PH 2: IPAH                      | 66  | F      | 46   |
| PH 3: Connective tissue disease | 62  | F      | 22   |
| PH 4: IPAH                      | 40  | F      | 42   |
| PH 5: IPAH                      | 67  | M      | 56   |
| PH 6: IPAH                      | 63  | M      | 59   |
| PH 7: IPAH                      | 72  | M      | 24   |
| PH 8: IPAH                      | 54  | F      | 44   |

**Table S3. Silencer RNA Reagent Information (Thermo Fisher Scientific)**

| Reagent                     | Catalog #                                           |
|-----------------------------|-----------------------------------------------------|
| Negative control siRNA (#1) | ON-TARGETplus Non-targeting siRNA(D-001810-01-05)   |
| IFI16 siRNA                 | ON-TARGETplus Human WTAP siRNA (LQ-017323-00-0002)  |
| WTAP siRNA (siRNA #1)       | ON-TARGETplus Human IFI16 siRNA (LQ-020004-00-0002) |
| BMPR2 siRNA                 | ON-TARGETplus BMPR2 siRNA (LQ-005309-00-0005)       |
| Negative control siRNA (#2) | Silencer AM4611                                     |
| WTAP siRNA (siRNA #2)       | Silencer ID: 44219                                  |

**Table S4. TaqMan Primers Reagent Information (Thermo Fisher Scientific)**

| Reagent      | Catalog #     |
|--------------|---------------|
| <i>IFI16</i> | Hs04987070_m1 |
| <i>WTAP</i>  | Hs00986757_m1 |

|                   |               |
|-------------------|---------------|
| <i>VCAM1</i>      | Hs01003372_m1 |
| <i>ICAM1</i>      | Hs01109748_m1 |
| <i>IL6</i>        | Hs00174131_m1 |
| <i>NF-κB</i>      | Hs00765730_m1 |
| <i>IL-1β</i>      | Hs01555410_m1 |
| <i>GAPDH</i>      | Hs02786624_g1 |
| <i>ACTB</i>       | Hs1060665_g1  |
| Mouse <i>WTAP</i> | Mm05666501_g1 |
| Mouse <i>ACTB</i> | Mm02619580_g1 |

**Table S5. Antibody Reagent Information**

| <b>Company</b> | <b>Use</b>         | <b>Reagent</b> | <b>Catalog #</b> |
|----------------|--------------------|----------------|------------------|
| Proteintech    | Western blot       | WTAP           | 60188-1-Ig       |
| Santa Cruz     | Western blot       | ACTB           | sc-47778         |
| Santa Cruz     | Immunofluorescence | WTAP           | sc-374280        |
| ThermoFisher   | Immunofluorescence | IFI16          | PA5120684        |
| Abcam          | Immunofluorescence | vWF            | ab287962         |
| ThermoFisher   | Immunofluorescence | vWF            | MA5-14029        |

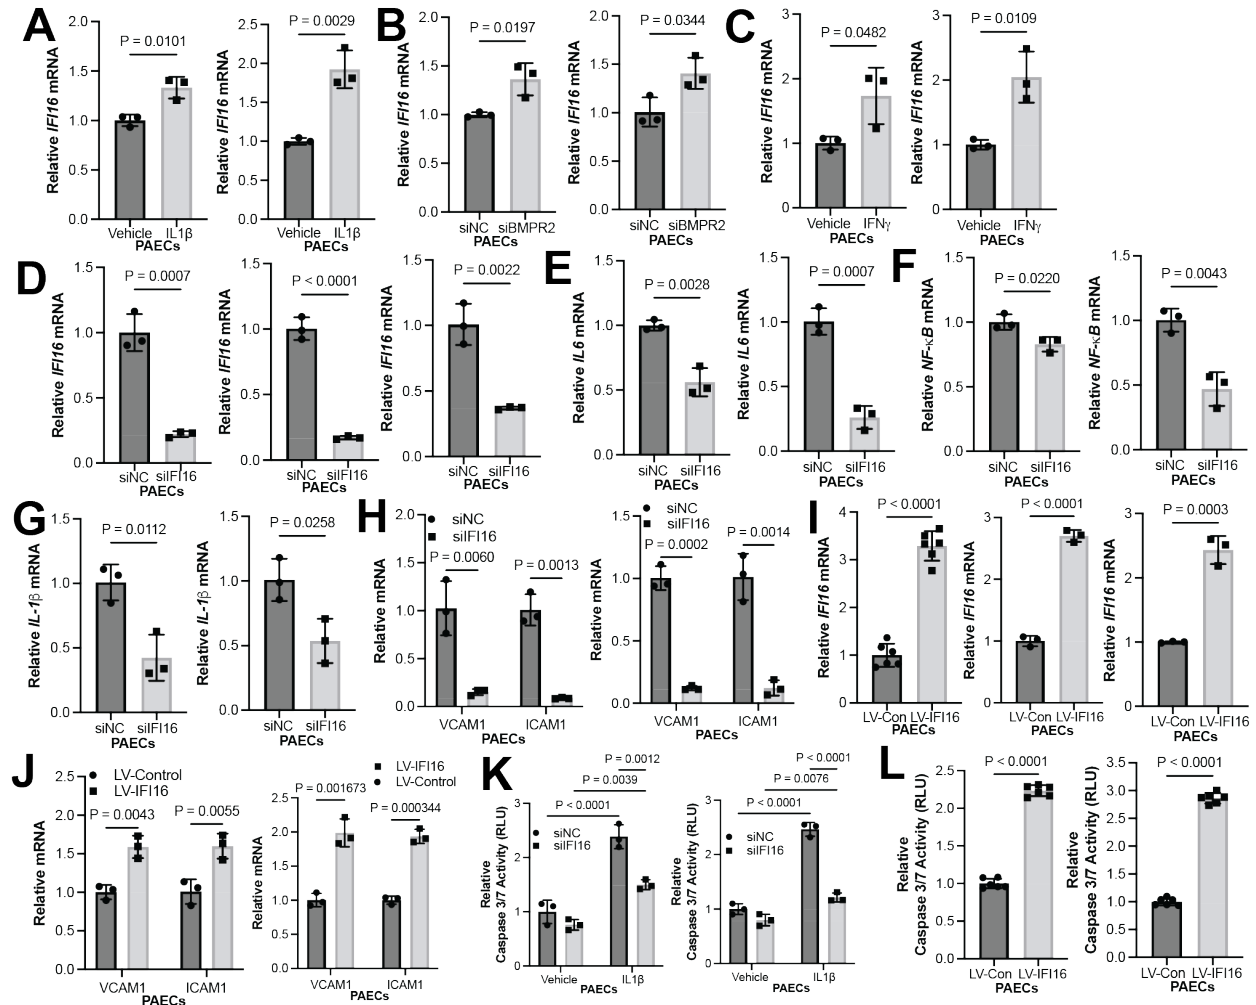

**Figure S1. Inflammatory and genetic regulation of endothelial IFI16 expression.**

(A) Experimental repeats of Fig. 1B. By RT-PCR, relative IFI16 expression (n=3/group) was measured in IL-1 $\beta$ -treated (2 ng/mL) vs. vehicle control (0 ng/mL) PAECs (n=3/group). (B) Experimental repeats of Fig. 1C. By RT-PCR, relative IFI16 expression was measured following siRNA-mediated BMPR2 knockdown (siBMPR2) vs. control (siNC) PAECs (n=3/group). (C) Experimental repeats of Fig. 1D. By RT-PCR, relative IFI16 expression was measured in IFN $\gamma$ -treated vs. vehicle control PAECs (n=3/group). (D) By RT-PCR, relative IFI16 expression was measured in IFI16-deficient (siIFI16) vs. control (siNC) PAECs (n=3/group). Experimental repeats of Fig. 1E-G. By RT-PCR, relative expression was of inflammatory cytokines (E) IL-6, (F) NF- $\kappa$ B, and (G) IL-1 $\beta$  were measured in IFI16-deficient (siIFI16) vs. control (siNC) PAECs (n=3/group).

(H) Experimental repeats of Fig. 1H. By RT-PCR, relative expression was measured of endothelial inflammatory markers VCAM1 and ICAM1 in IFI16-deficient (silFI16) vs. control (siNC) PAECs (n=3/group); (I) By RT-PCR, relative IFI16 expression was measured following IFI16 overexpression (LV-IFI16) vs. control (LV-Control) PAECs (n=6 or 3/group). (J) Experimental repeats of Fig. 1I. Relative expression of VCAM1 and ICAM1 was measured following overexpression (LV-IFI16) vs. control (LV-Con) transduction IFI16 in PAECs (n=3/group). (K) Experimental repeats of Fig. 1J. Relative caspase 3/7 activity was measured after IFI16 knockdown (silFI16) vs. control in PAECs +/- IL-1 $\beta$  (n=3/group). (L) Experimental repeats of Fig. 1K. Relative caspase 3/7 activity was measured following IFI16 overexpression (LV-IFI16) vs. control (LV-Con) transduction in PAECs (n=6/group). In (A-L), mean expression in control groups was assigned a fold change of 1, to which relevant samples were compared. P-values calculated by two-tailed Student's *t* test (A-J, L), and two-way ANOVA and post-hoc Bonferroni test (K), presented as mean +/- SEM.

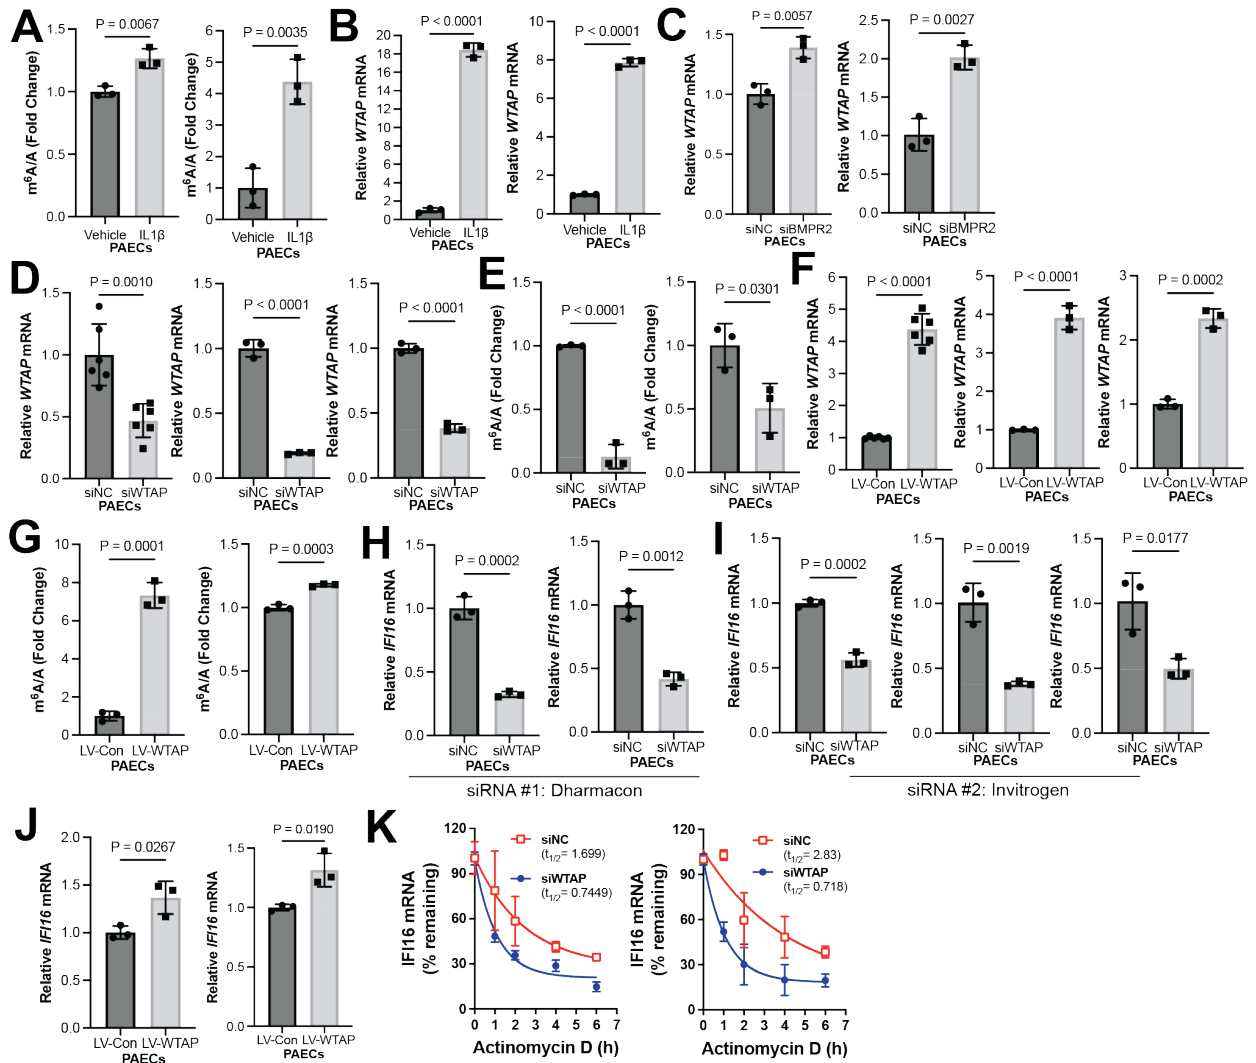

**Figure S2. Inflammatory and genetic regulation of endothelial WTAP expression.** (A) Experimental repeats of Fig. 2B. Fold change of m<sup>6</sup>A/A was measured by colorimetric assay in IL-1 $\beta$ -treated vs. LV-control (vehicle) PAECs (n=3/group). (B) Experimental repeats of Fig. 2D. By RT-PCR, relative WTAP transcript expression was measured (n=3/group) in IL-1 $\beta$ -treated (2 ng/mL) vs. vehicle control (0 ng/mL) PAECs (n=3/group). (C) Experimental repeats of Fig. 2E. By RT-PCR, relative WTAP expression was measured following siRNA-mediated BMPR2 knockdown (siBMPR2) vs. control (siNC) PAECs (n=3/group). (D) By RT-PCR, relative WTAP expression was measured in WTAP-deficient (siWTAP) vs. control (siNC) PAECs (n=6 or

3/group). **(E)** Experimental repeats of Fig. 2F. Fold change of m6A/A was measured by colorimetric assay in WTAP-deficient (siWTAP) vs. control (siNC) PAECs (n=3/group). **(F)** By RT-PCR, relative WTAP expression was measured following WTAP overexpression vs. control PAECs (n=6 or 3/group). **(G)** Experimental repeats of Fig. 2G. Fold change of m6A/A was measured by colorimetric assay following WTAP overexpression (LV-WTAP) vs. control (LV-Con) PAECs (n=3/group). **(H)** Experimental repeats of Fig. 2H. By RT-PCR, relative IFI16 expression was measured in WTAP-deficient (siWTAP) vs. control (siNC) PAECs (n=3/group) using siRNA #1 (Dharmacon). **(I)** By RT-PCR, relative IFI16 expression was measured in WTAP-deficient (siWTAP) vs. control (siNC) PAECs (n=3/group) using siRNA #2 (Invitrogen). **(J)** Experimental repeats of Fig. 2I. By RT-PCR, relative IFI16 expression was measured after WTAP overexpression (LV-WTAP) vs. control (LV-Con) transduction in PAECs (n=3/group). **(K)** Experimental repeats of Fig. 2K. IFI16 mRNA decay was measured in WTAP-deficient (siWTAP) vs. control (siNC) PAECs following inhibition of cellular transcription by actinomycin D (n=3/group, presented as mean and 95% CI). In **(A-J)**, mean expression in control groups was assigned a fold change of 1, to which relevant samples were compared. P-values calculated by two-tailed Student's *t* test **(A-J)** presented as mean +/- SEM.

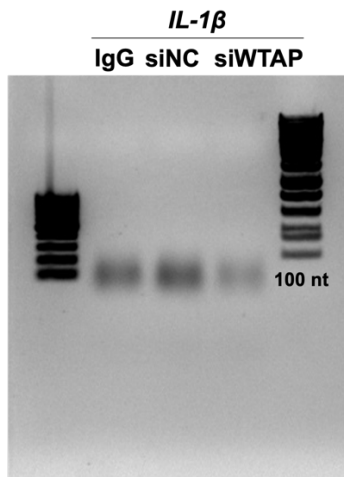

**Figure S3. Fragmentation of RNA for MeRIP.** Calibration of RNA fragmentation and validation of size distribution are shown by gel electrophoresis prior to immunoprecipitation by MeRIP. Fragments converged on ~100 nucleotides in size.



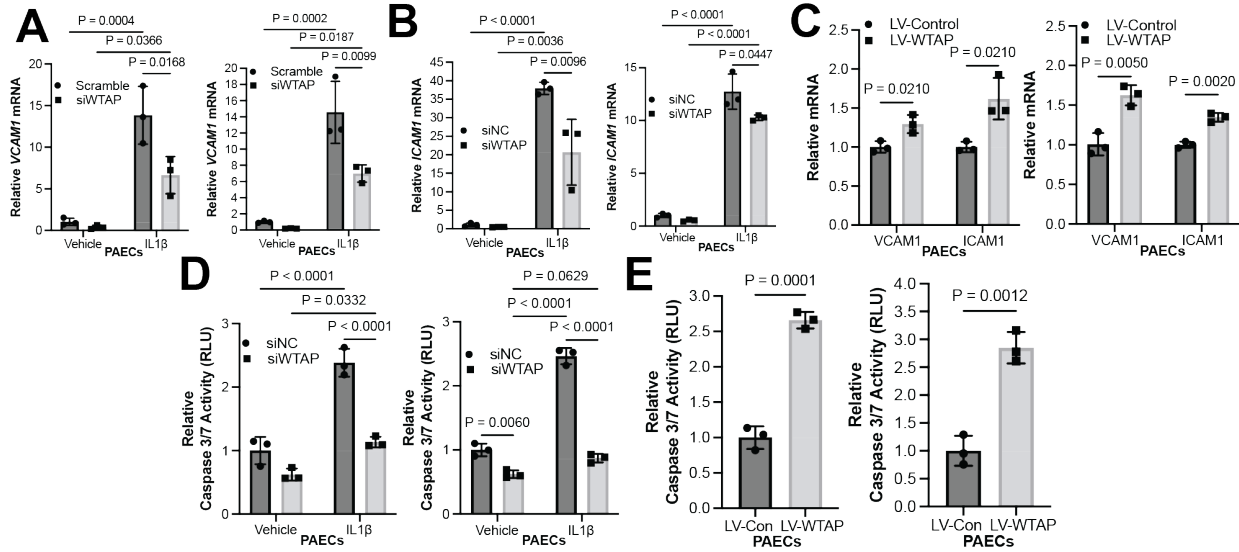

**Figure S4. WTAP phenocopies IF16-driven endothelial pathophenotypes in PAECs. (A-B)** Experimental repeats of Fig. 3A-B. By RT-PCR, relative expression was measured of endothelial inflammatory markers **(A)** VCAM1 and **(B)** ICAM1 in WTAP-deficient (siWTAP) vs. control (siNC) with and without IL-1 $\beta$  in PAECs (n=3/group). **(C)** Experimental repeats of Fig. 3C. Relative expression of VCAM1 and ICAM1 was measured following WTAP overexpression (LV-WTAP) vs. control (LV-Con) transduction in PAECs (n=3/group). **(D)** Experimental repeats of Fig. 3D. Relative caspase 3/7 activity was measured after WTAP knockdown (siWTAP) vs. control in PAECs with and without IL-1 $\beta$  (n=3/group). **(E)** Experimental repeats of Fig. 3E. Relative caspase 3/7 activity was measured after WTAP overexpression (LV-WTAP) vs. control (LV-Con) transduction in PAECs (n=3/group). In all panels, mean expression in control groups was assigned a fold change of 1, to which relevant samples were compared. P-values calculated by two-tailed Student's *t* test **(C, E)** and two-way ANOVA and post-hoc Bonferroni test **(A, B, D)**, presented as mean +/- SEM.
